# Supplementary material for: Successful ablation of refractory neonatal atrial flutter
Source: PubMed Central journal article supplement — HeartRhythm Case Rep. 2015 Apr 1;1(4):245–8. doi: 10.1016/j.hrcr.2015.03.010 (PMC5419411; doi:10.1016/j.hrcr.2015.03.010), 2015-04-01

## SUPPLEMENTARY MATERIAL

### MOVIE 1 Flutter Circuit

Movie legend:

The 3D propagation map of the right atrium in RAO (left) and LAO (right) views. It shows a counterclockwise macro-reentry around the cavotricuspid isthmus. The transoesophageal electrode (Oeso) and the ablation electrode are depicted as orange catheter and white catheter respectively. (SVC: Superior vena cava, IVC: Inferior vena cava, AVN: Atrioventricular node). The propagation map confirms counterclockwise peritricuspid flutter, covering the complete 200ms of cycle length.

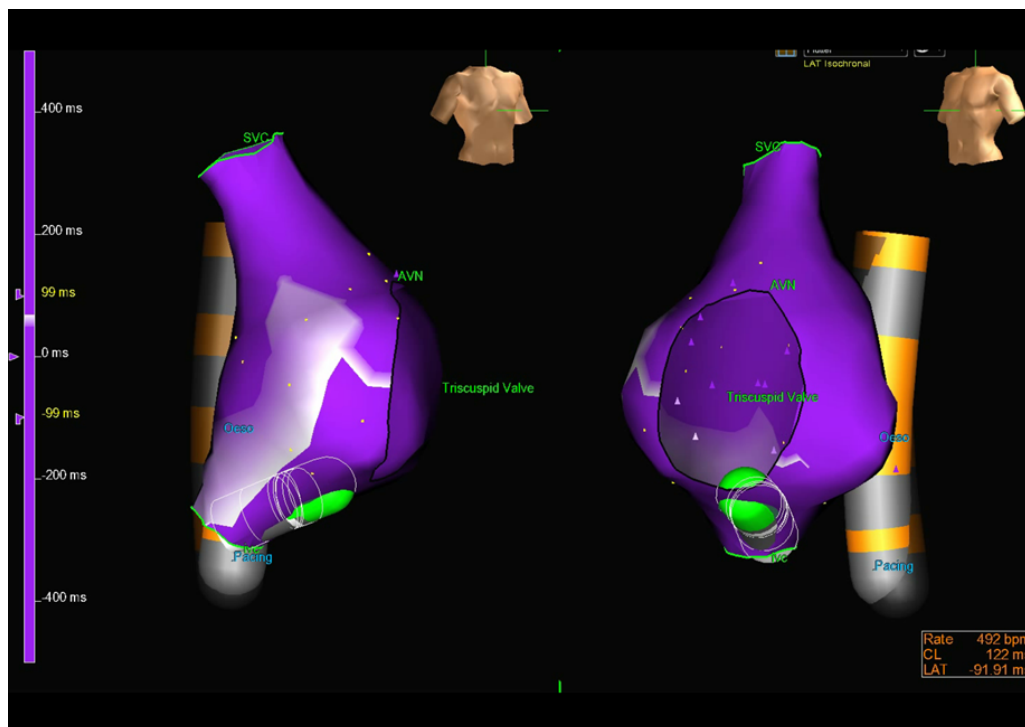

## MOVIE 2: Post Ablation

### Movie legend:

The RAO view and LAO view of the right atrial propagation map post ablation with pacing from the esophageal electrode suggesting unidirectional conduction block along the cavotricuspid isthmus with about 80ms delay at the lateral atrial wall and no visible conduction through the ablation line. Due to the fixed position of the esophageal electrode no reliable testing for bidirectional block was possible.

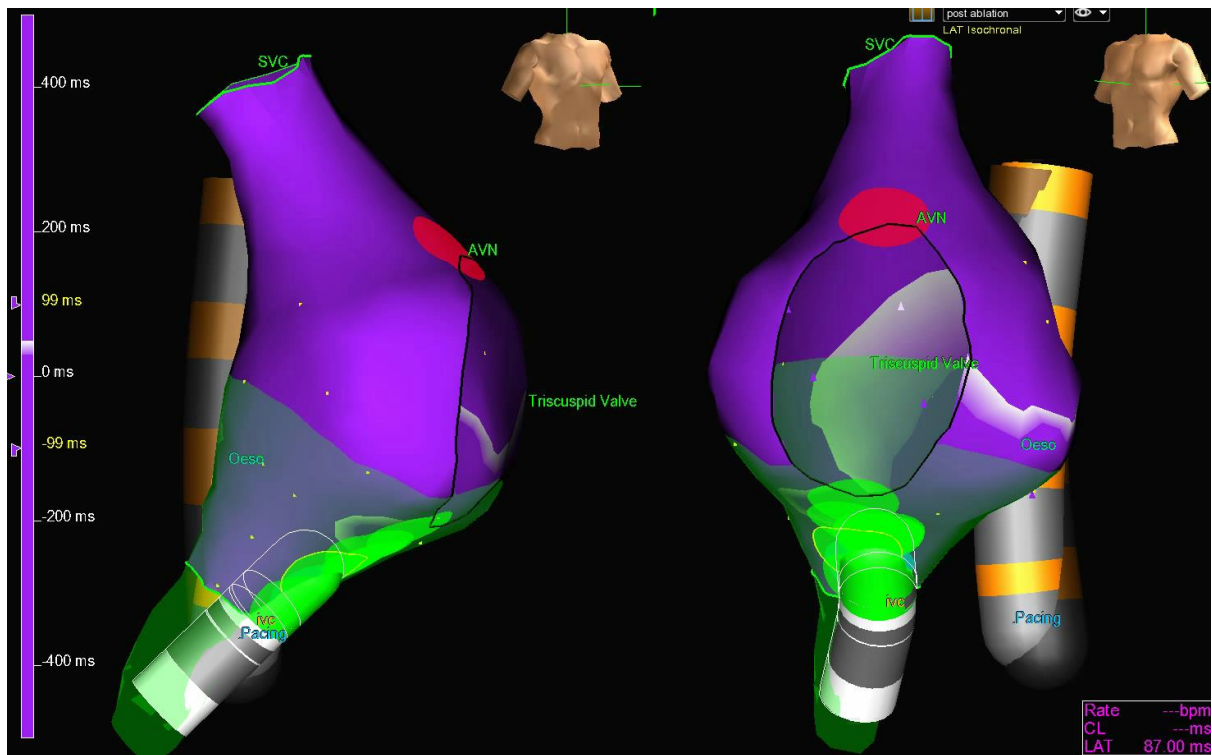

Supplement: mmc1.pdf [file mmc1.pdf]
